# Supplementary material
Source: PubMed Central journal article supplement (PMC6337701)
Supplement: ddy366_hmg_supplemental_fugures_jang_2018.pdf [file ddy366_hmg_supplemental_fugures_jang_2018.pdf]

**Hematopoietic and neural crest defects in zebrafish *shoc2* mutants:  
a novel vertebrate model for Noonan-like syndrome**

HyeIn Jang<sup>1</sup>, Erin Oakley<sup>1</sup>, Marie Forbes-Osborne<sup>2</sup>, Melissa Kesler<sup>3</sup>, Rebecca Norcross<sup>1</sup>,  
Ann C Morris<sup>2</sup>, Emilia Galperin<sup>1\*</sup>

<sup>1</sup> Department of Molecular and Cellular Biochemistry, University of Kentucky, Lexington,  
Kentucky 40536, United States of America

<sup>2</sup> Department of Biology, University of Kentucky, Lexington, Kentucky 40506, United States of  
America

<sup>3</sup> Division of Pathology and Laboratory Medicine, Lexington, Kentucky 40536, United States of  
America

\* Corresponding author

Emilia Galperin

E-mail: [emilia.galperin@uky.edu](mailto:emilia.galperin@uky.edu)

[Telephone: +1 859-323-1796](tel:+18593231796)

[Fax: +1 859-257-2283](tel:+18592572283)

# S1 Fig

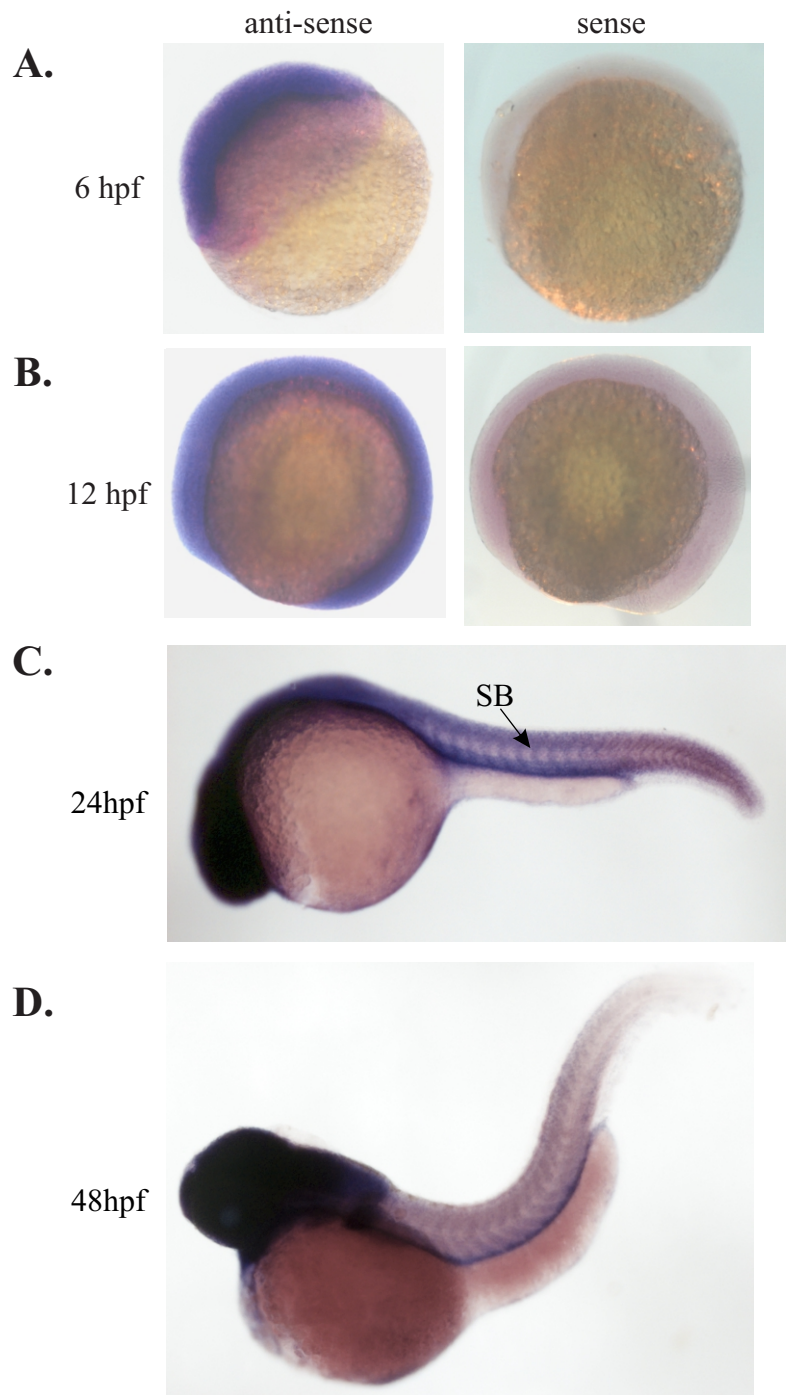

# S2 Fig

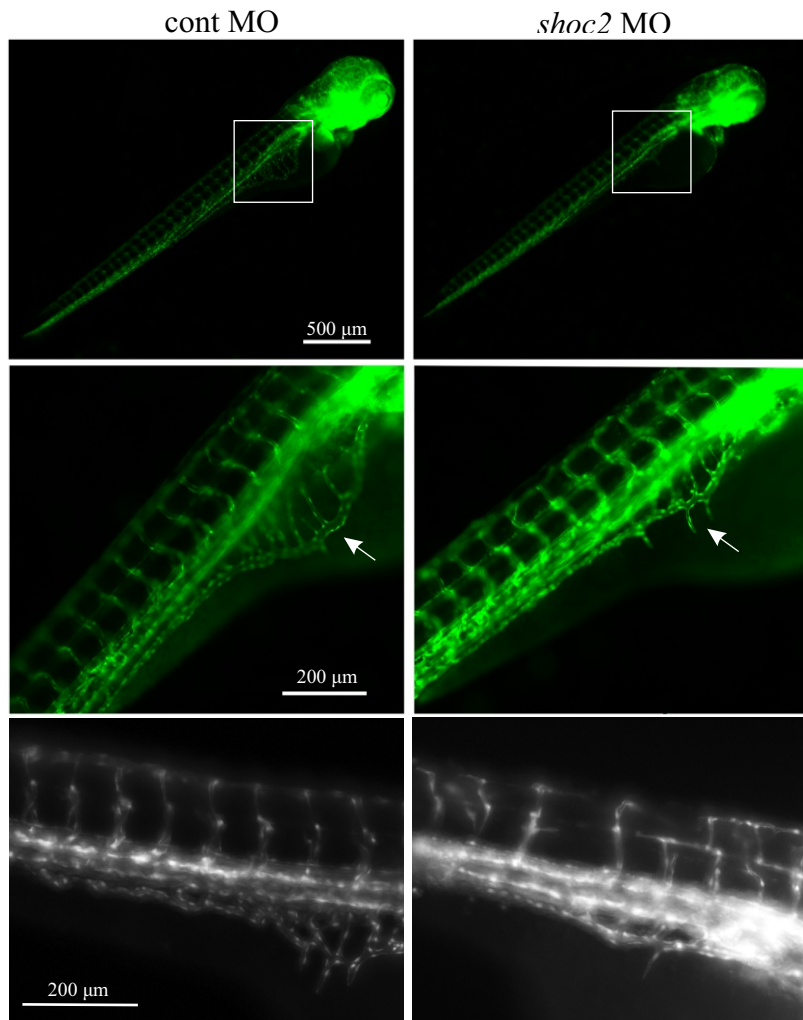

# S3 Fig

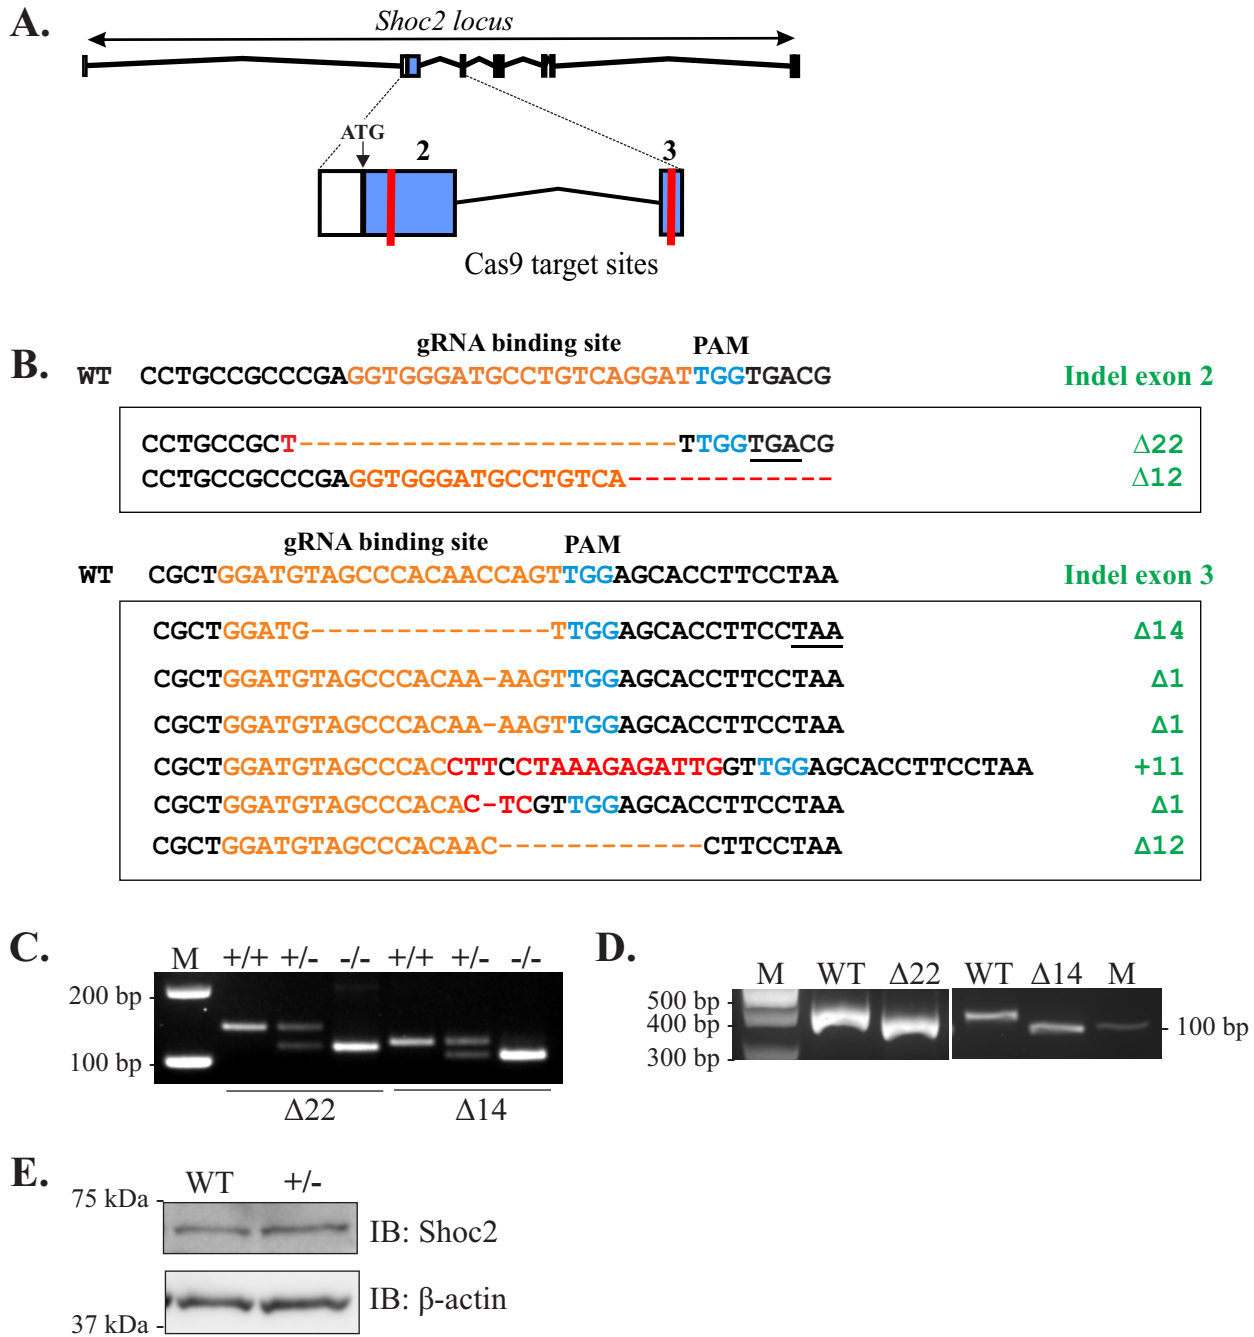

# S4A Fig

## A. Exon 2 target site HRMA

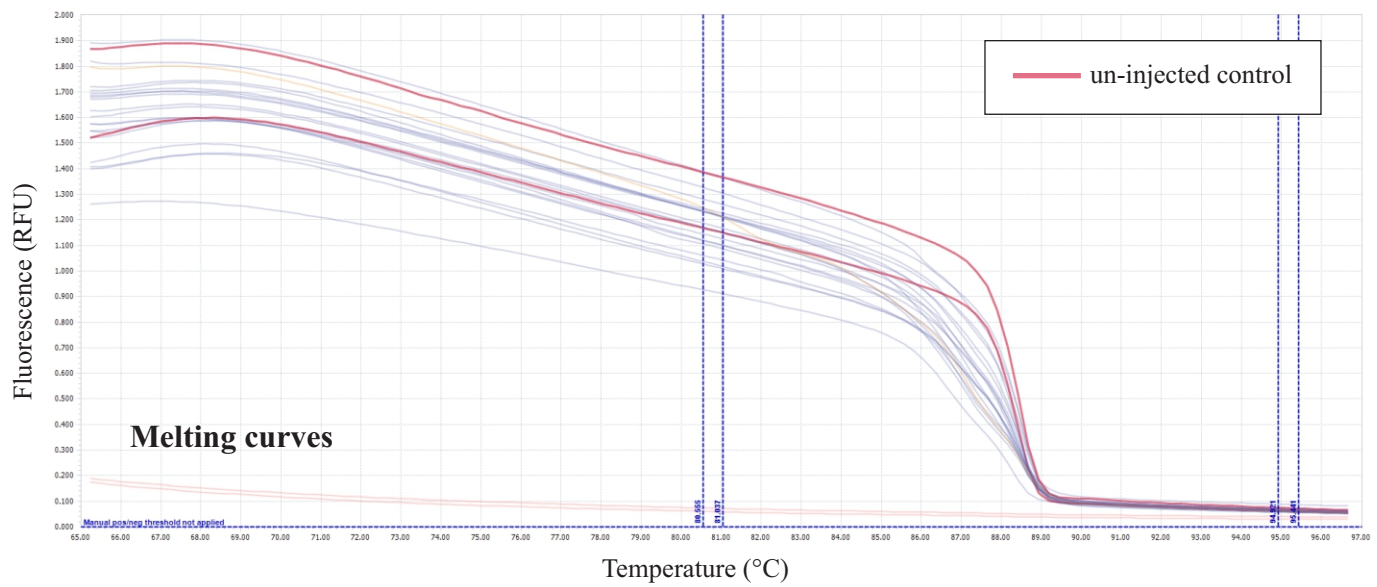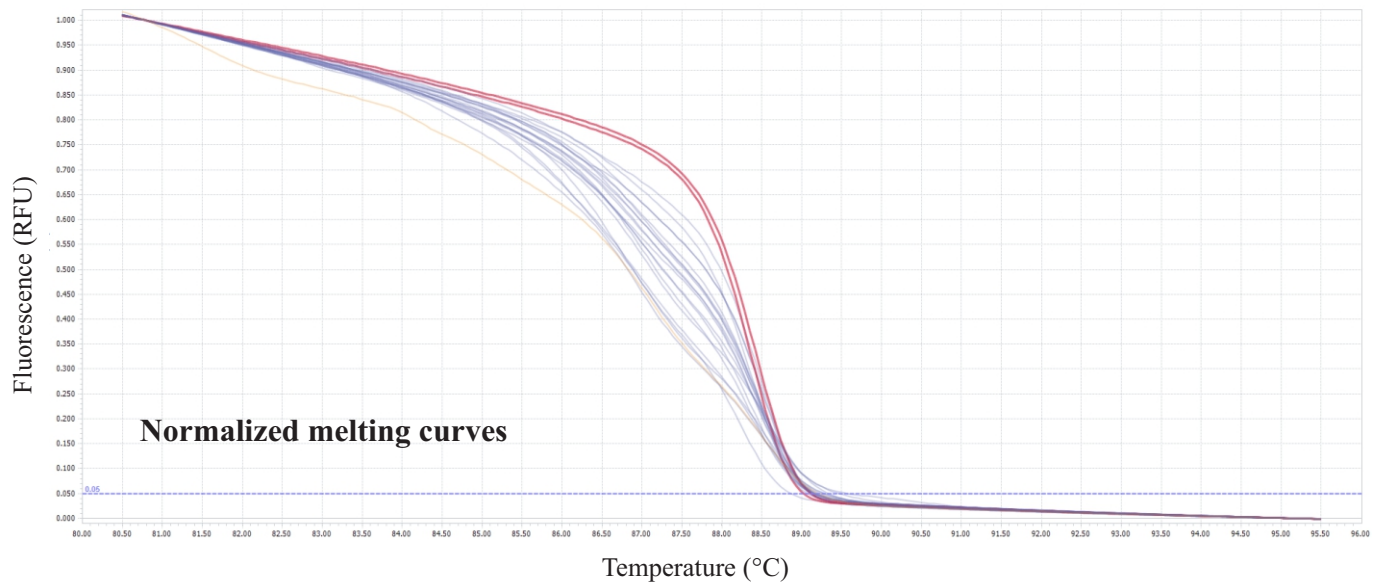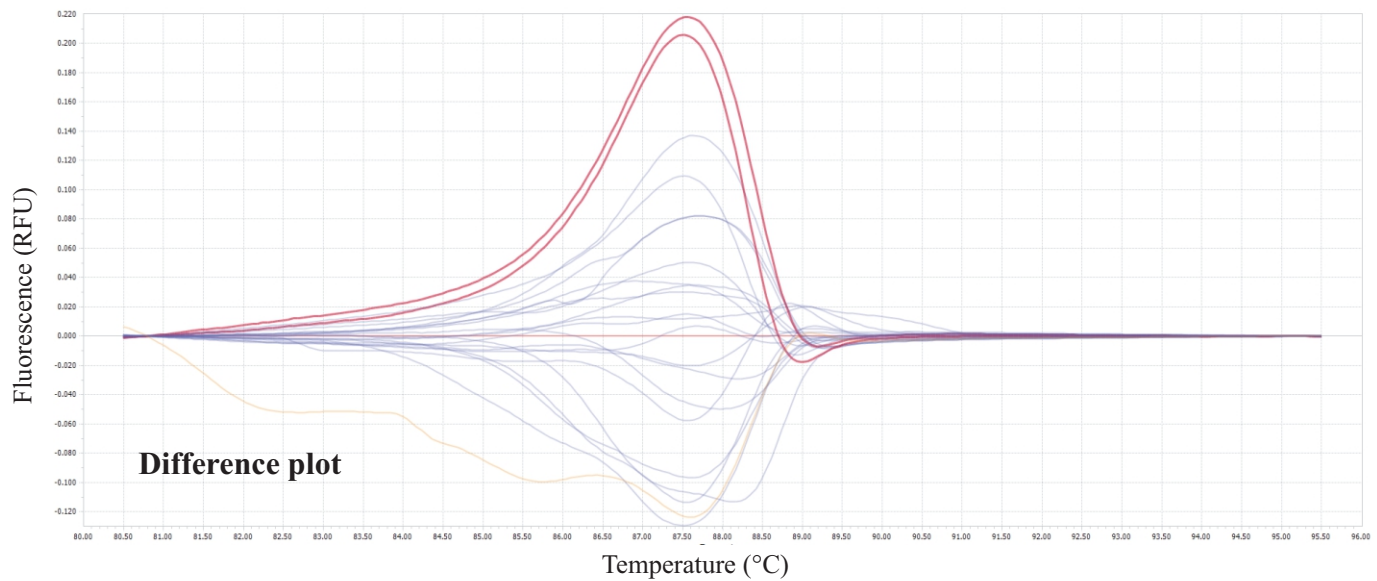

# S4B Fig

## B. Exon 3 target site HRMA

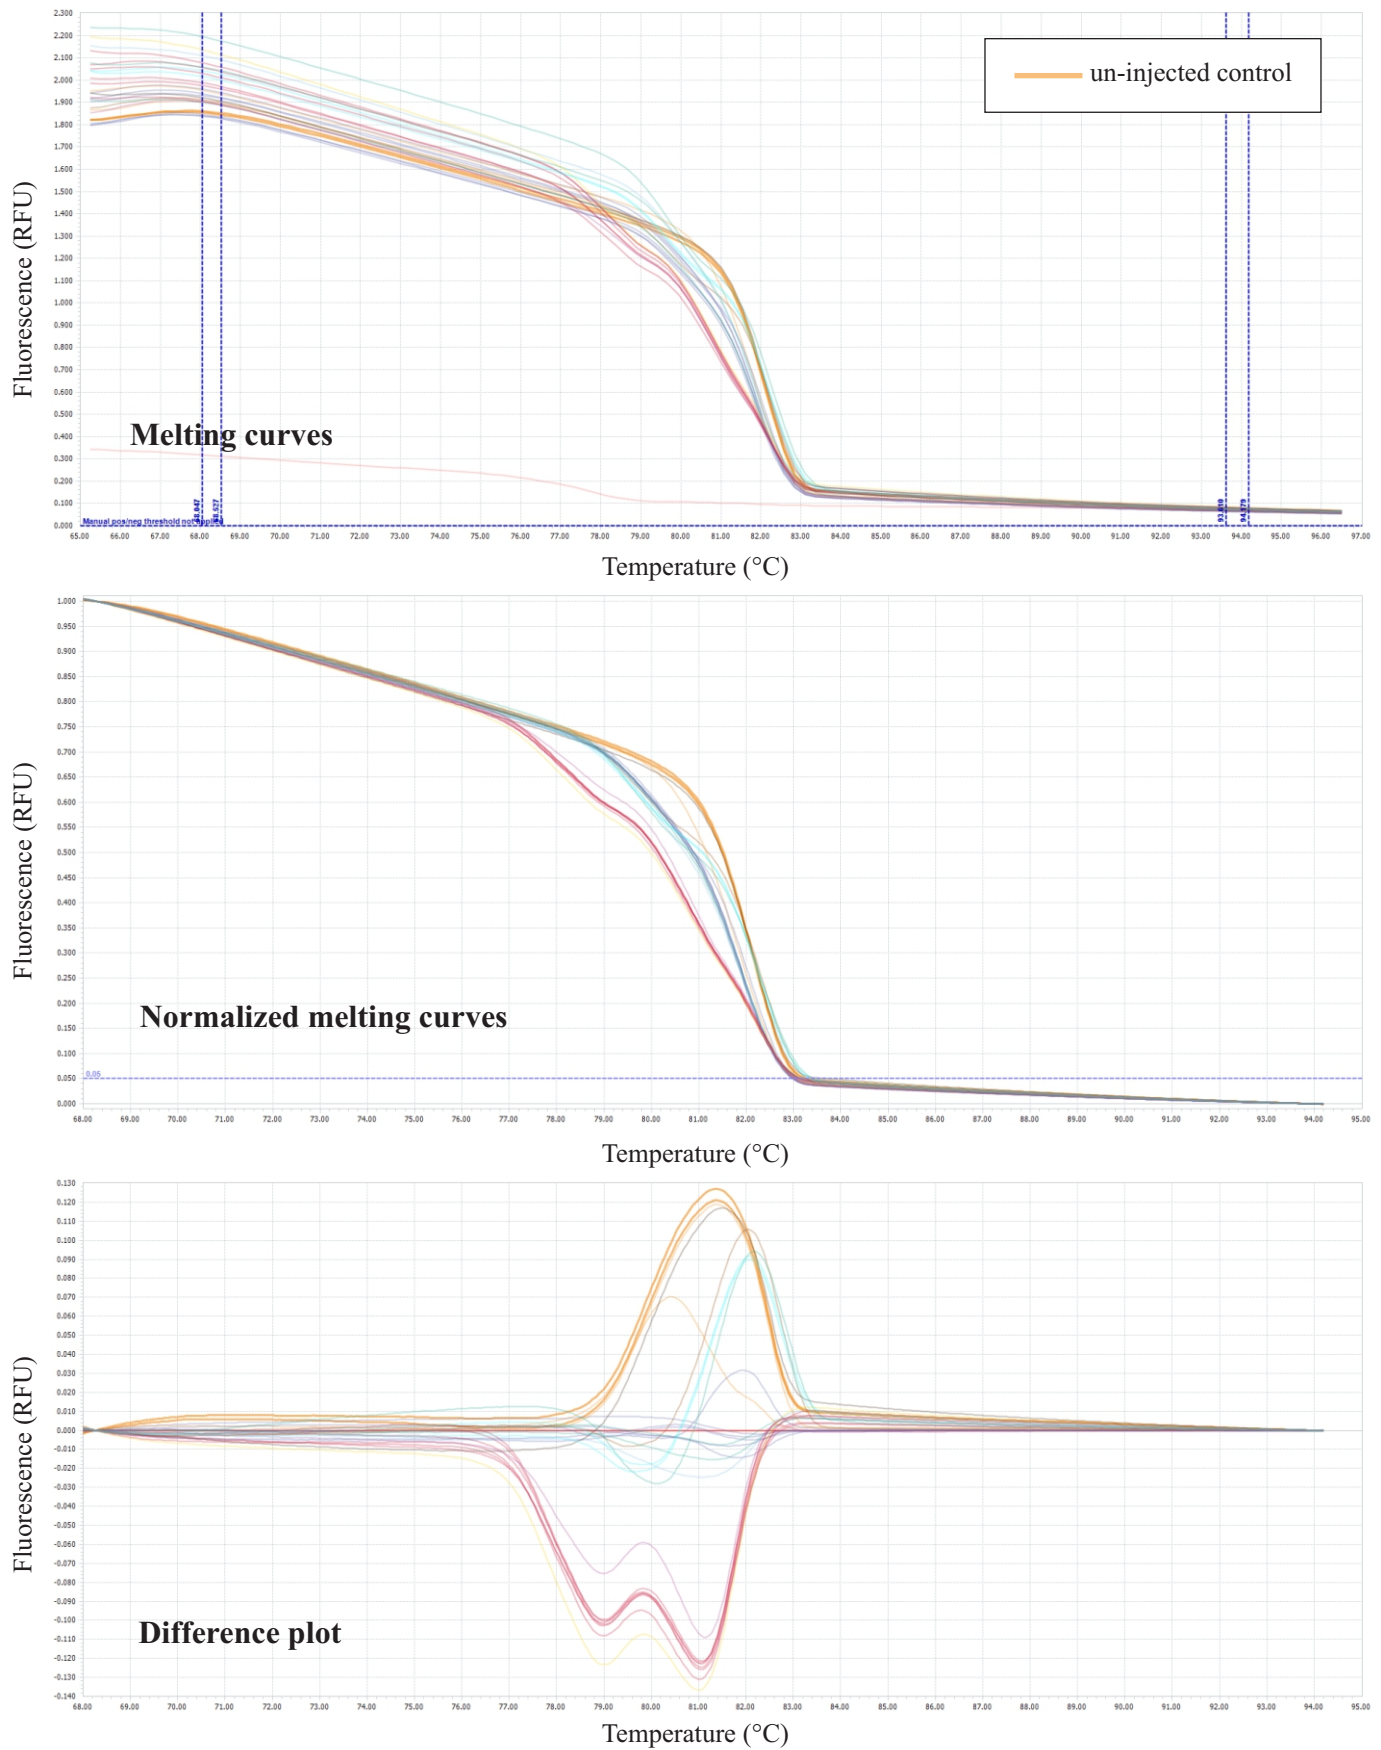



# S5 Fig

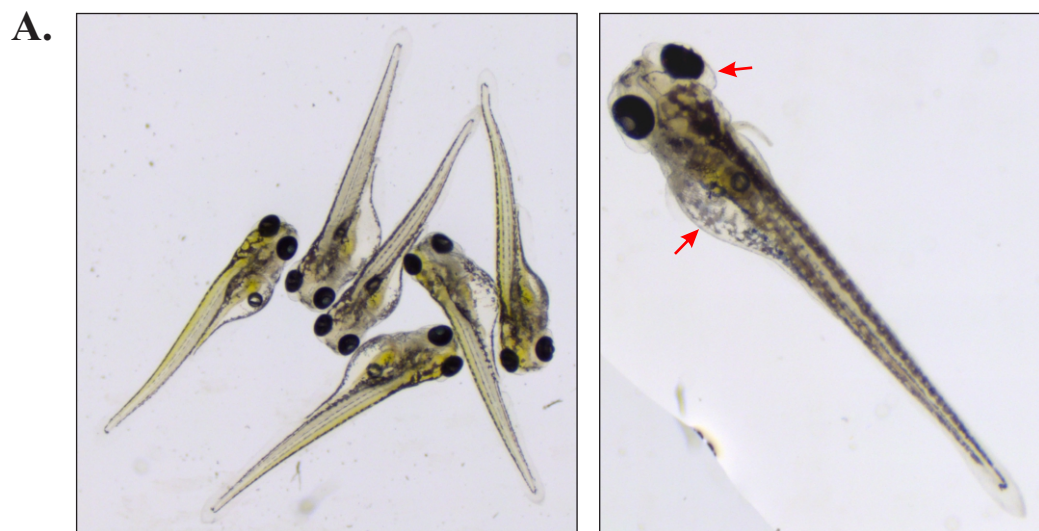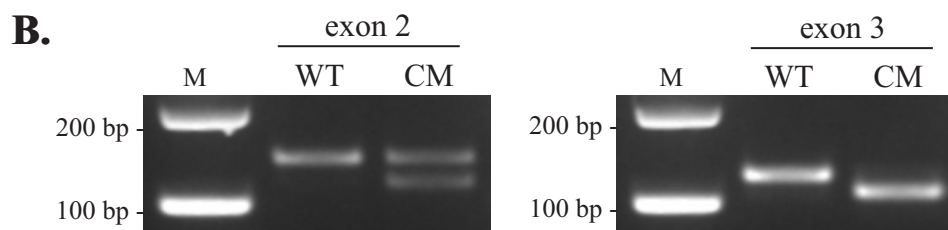

# S6 Fig

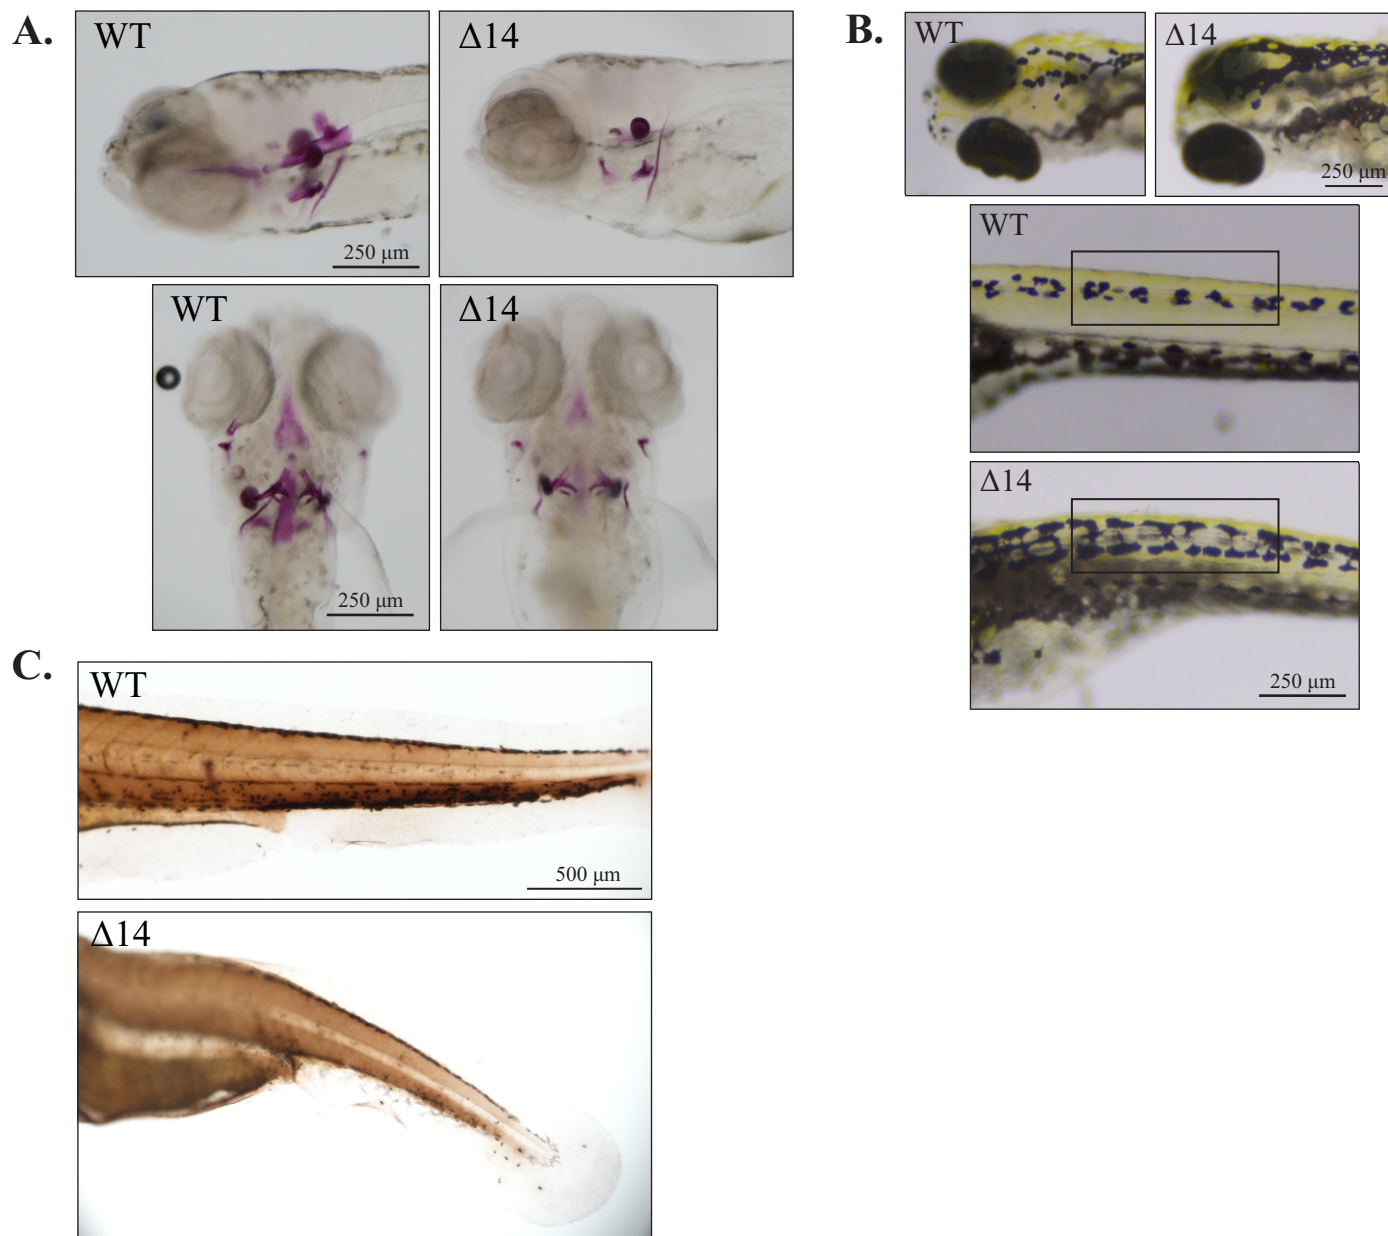



**S7 Fig**

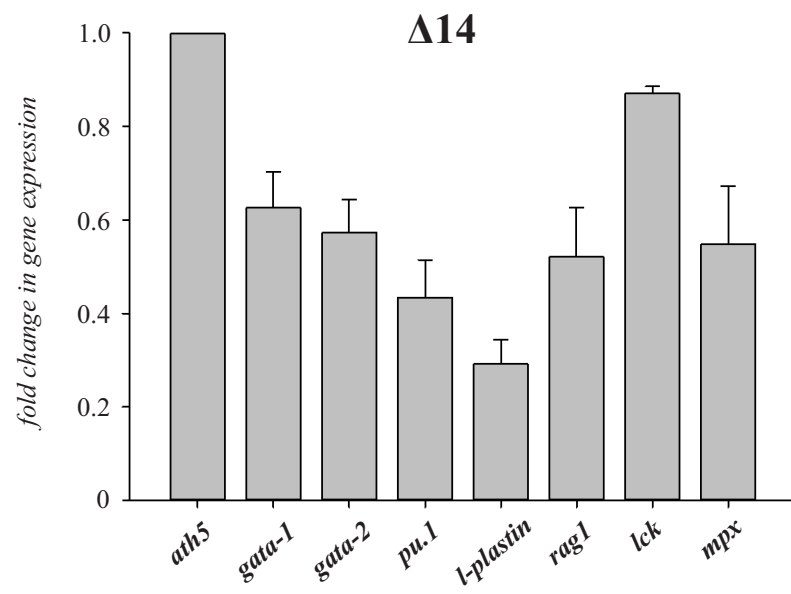

# S8 Fig

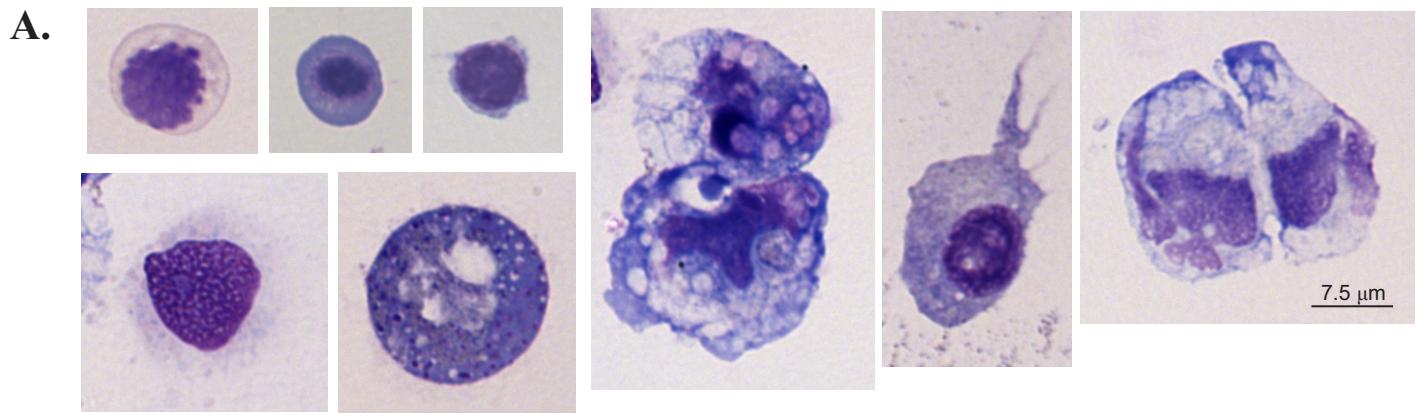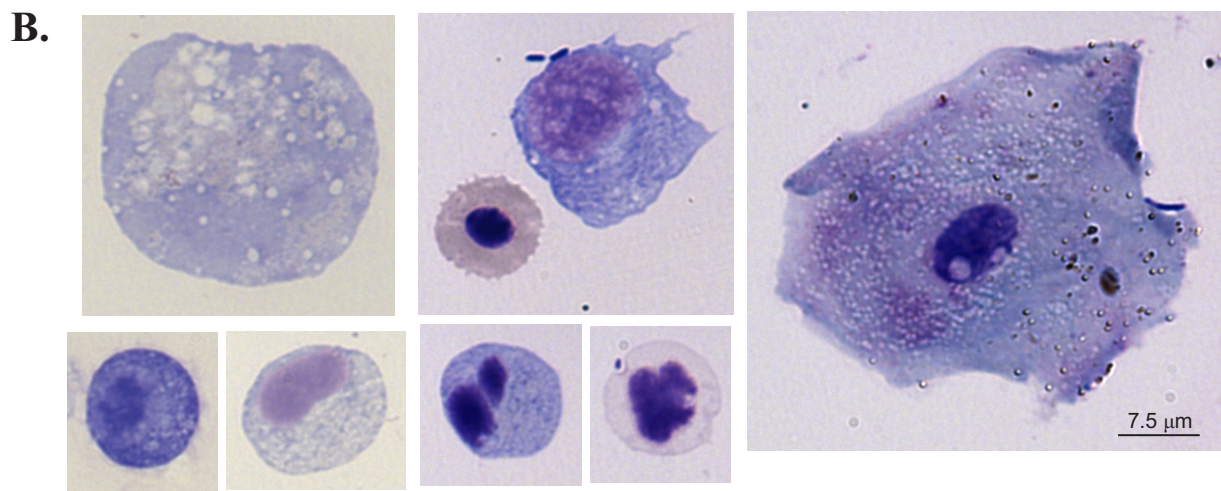

# S9 Fig

**A.**

*sox10*:RFP sorted cells

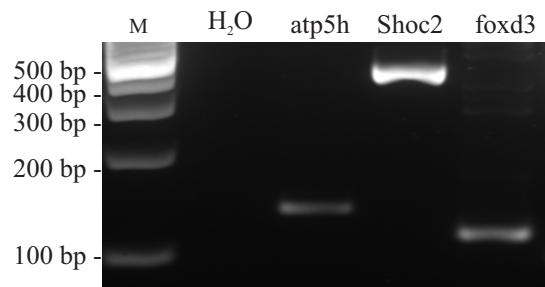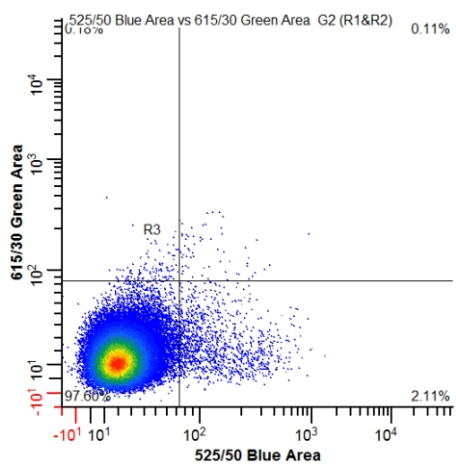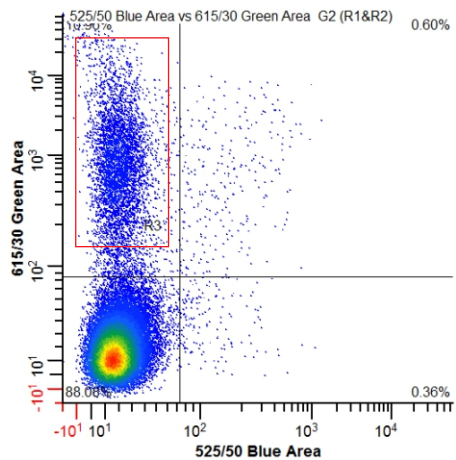

**B.**

*gata1a*:dsRed sorted cells

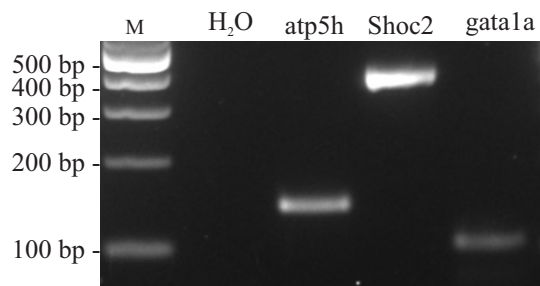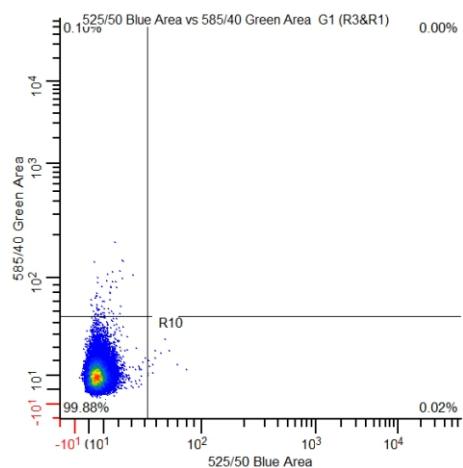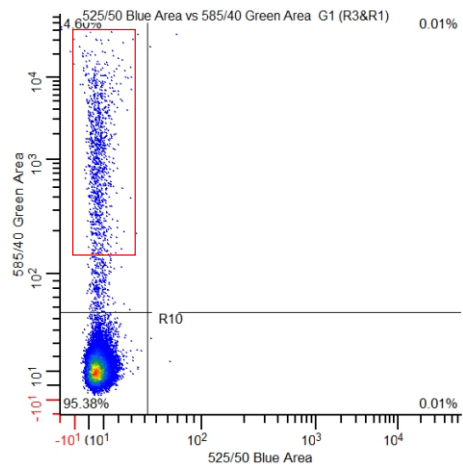

## Supplemental Table 1

|                  | M                | WT | $\Delta 22$ | $\Delta 14$ | <u>Forward primer</u>         | <u>Reverse primer</u>       |
|------------------|------------------|----|-------------|-------------|-------------------------------|-----------------------------|
| <i>atp5h</i>     | 200 bp           |    |             |             | 5'-TGCCATCTCAGCAAACTTG-3'     | 5'-CACAGGCTCAGGAACAGTCA-3'  |
| <i>l-plastin</i> | 300 bp<br>200 bp |    |             |             | 5'-GTCGATGTGGATGGGAACGG-3'    | 5'-CCCTCCTCGGAGTATGAGTGC-3' |
| <i>gata-1a</i>   | 200 bp<br>100 bp |    |             |             | 5'-AAGATGGGACAGGCCACTA-3'     | 5'-TGCTGACAATCAGCCTCTTTT-3' |
| <i>mpx</i>       | 300 bp<br>200 bp |    |             |             | 5'-TTCTTTTTGTGGTGGGCTGC-3'    | 5'-CTCCCGTGTCTTTCGAGCTG-3'  |
| <i>gata-2a</i>   | 100 bp           |    |             |             | 5'-AACAATCGGGCTGTGGACAA-3'    | 5'-AGCACTCCAATCCTGCGTTT-3'  |
| <i>pu.1</i>      | 300 bp           |    |             |             | 5'-CAGAGCTACAAAGCGTGCAG-3'    | 5'-GCAGAAGGTCAAGCAGGAAC-3'  |
| <i>lck</i>       | 300 bp<br>200 bp |    |             |             | 5'-ACAATTTGGCAGCACATGTCTTT-3' | 5'-GGCAGTTACACTGGTCACAC-3'  |
| <i>rag-1</i>     | 300 bp<br>200 bp |    |             |             | 5'-CCAGGTGAAGACATTTGCCG-3'    | 5'-ATTACGCAGAGTGTGCAGGG-3'  |
| <i>foxd3</i>     | 200 bp<br>100 bp |    |             |             | 5'-TTGACGCTCAGTGGAAATC-3'     | 5'-TCTTGACGAAGCAGTCGT-3'    |

## SUPPORTING FIGURE LEGENDS

### **S1 Fig. Expression pattern of *shoc2* in zebrafish embryonic development.**

RNA *in situ* hybridization with antisense probes for *Shoc2* in WT embryos at 6 (A), 12 (B), 24 (C) and 48 hpf (D). An extensive anterior expression in the head region and the somite boundaries (black arrow) was observed at later stages (C and D). Images are in lateral views, anterior to the left.

### **S2 Fig. Disruption of zebrafish *shoc2* results in vasculature defects.**

*fli1a:EGFP* embryos were injected with control or *shoc2* MO. Control embryo showed well-organized inter-segmental vessels, while embryos injected with *shoc2* MO showed aberrant trunk blood vessels and disorganized sub-intestinal vein, indicated by arrow. All embryos shown in lateral view with anterior to the right and dorsal to the top. Images are taken at 3 dpf.

### **S3 Fig. Heritable mutations of the *Shoc2* gene.**

(A) Zebrafish *Shoc2* genomic locus on chromosome 22 with the DNA cleavage positions (in exon 2 and exon 3 indicated by the red bars).

(B) Details of the F1 offspring genotypes. The F1 genotypes contain deletions (dashes) and insertions (red letters) at the *shoc2* gRNA and #2 sites (orange letters) near proto-spacer adjacent motif sequences (blue letters). The numbers of deleted or inserted base pairs and resultant frameshift mutations are indicated, the premature stop codons are underlined.



(C) PCR analysis of genomic DNA allows for sensitive detection of WT and *shoc2*<sup>A22</sup> and *shoc2*<sup>A14</sup> mutant alleles in individual larvae (F3 generation). Acrylamide gel electrophoresis shows PCR amplicons of WT, heterozygous and homozygous *shoc2*<sup>A22</sup> and *shoc2*<sup>A14</sup> carriers.

(D) RT-PCR analysis allows for sensitive detection of WT and *shoc2*<sup>A22</sup> and *shoc2*<sup>A14</sup> mutant RNA in individual larvae. Acrylamide gel electrophoresis shows PCR amplicons of WT, heterozygous and homozygous *shoc2*<sup>A22</sup> and *shoc2*<sup>A14</sup> carriers.

(E) Western blot analysis detects unaltered expression of Shoc2 protein in adult WT and *shoc2*<sup>A22+/-</sup> zebrafish. M- DNA Marker.

**S4 Fig. Detection of *shoc2* mutant alleles in individual *shoc2* sgRNA/Cas9 injected embryos.**

The HRMA curve discriminates WT and mutant alleles. The genomic DNA was prepared from individual 1 day-post-injected embryos. The LightCycler® 480 High Resolution Melting Master and LightCycler® 96 system were used. The curves of embryos injected with *shoc2* sgRNA/Cas9 targeting exon 2 (A) and exon 3 (B) were shifted and irregular, indicating the presence of insertions/deletions.

**S5 Fig. *shoc2*<sup>A22</sup>-*shoc2*<sup>A14</sup> compound mutants develop edemic phenotype.**

*shoc2*<sup>A22+/-</sup> and *shoc2*<sup>A14+/-</sup> adult fish were crossed to generate *shoc2*<sup>A22</sup>-*shoc2*<sup>A14</sup> compound mutants. (A) Images of 6 dpf compound crispants show edemic phenotype similar to the observed in *shoc2*<sup>A22</sup> and *shoc2*<sup>A14</sup> crispants. Red arrows indicate edema around the eye, heart/yolk region of the larva. (B) PCR analysis of genomic DNA confirms the deletions in both alleles: exon2 with 22 bp deletion and exon3 with 14 bp deletion. M- DNA Marker. CM- compound mutant.

**S6 Fig. Developmental impairments of *shoc2*<sup>Δ14</sup> crispant larvae.**

(A) Alizarin Red S stain for the craniofacial ossification of 6 dpf WT and *shoc2*<sup>Δ14</sup> larvae detected defects in ossification of parasphenoid, ceratohyal, branchiostegal rays, opercle, ceratohyal and notochord. For schematic representation, see Fig 5B. Three biological replicates were performed for all experiments (n= 30/group).

(B) Dorsal (head) and lateral (trunk) views of 6 dpf larvae showing melanophores in WT and *shoc2*<sup>Δ14</sup> crispants. *shoc2*<sup>Δ14</sup> mutants presented with closed gaps in pigmentation pattern of head and lateral stipe (brackets) melanophores when compared with WT controls.

(C) Histochemical staining for mpx enzyme activity in 6 dpf WT and *shoc2*<sup>Δ14</sup> crispants. Larvae are shown in lateral view with the anterior to the left. The images are representative of  $\geq 20$  larvae in each group. The staining was repeated with similar results for three independent experiments.

**S7 Fig. Loss of *shoc2* causes a reduction in the expression of blood cell markers.**

The relative changes in the expression of hematopoietic markers were evaluated in *shoc2*<sup>Δ14</sup> crispants. Total RNA was extracted from 6 dpf WT and mutant larvae and levels of mRNA expression were quantified by qPCR. The data are presented as the fold change of the mRNA levels in WT larvae versus the mRNA levels in mutant larvae. *ath5* is a control mRNA. The results represent an average of three biological replicas. Error bars indicate means with SEM. \*\* $p < 0.05$  (Student's t-test).

**S8 Fig. Blood cell types found in 6 dpf larvae.**

Peripheral blood cells from (A) WT and (B) *shoc2*<sup>A22</sup> larvae at 6 dpf stained with May-Grünwald Giemsa. Blood cells isolated from six WT or six *shoc2*<sup>A22</sup> larvae were cytospun onto a coated slide and stained. Various blood cell subtypes were detected in both WT and *shoc2*<sup>A22</sup> larvae.

**S9 Fig. *shoc2* expressed in neural crest and hematopoietic cells.**

*sox10:RFP* and *gata1a:dsRed* positive cells were isolated from the corresponding transgene adult fish using flow cytometry. FACS profile of *sox10:RFP* and *gata1:dsRed* are shown in (A) and (B), respectively. Red boxes in (A) and (B) indicate the collected cell populations. Total RNA was isolated and RT-PCR was performed. RT-PCR detected *shoc2* in both *sox10*- and *gata1a*-positive flow-sorted cells. *foxd3* (A) and *gata1a* (B) were included to confirm the specificity of flow sorting. M- DNA Marker.

**S1 Movie: *shoc2*<sup>A22</sup> crispants display increased heart rate.**

WT (A) larvae had average 120 beats/minute while *shoc2*<sup>A22</sup> crispant (B) had 148 beats/min. Time-lapse images were acquired at 100 frames per sec during 1 min at room temperature using Nikon Eclipse Ti-U (Nikon Instruments).

**S1 Table. RT-PCR of hematopoietic and non-hematopoietic genes.**

RT-PCR of cells and WT, *shoc2*<sup>A22</sup> and *shoc2*<sup>A14</sup> larvae. Genes are indicated to the left, *atp5h* is used as a reference gene. Primer sequences are to the right of each gene.
